# Supplementary material
Source: MDPI journal article supplement (https://www.mdpi.com/2073-4441/13/9/1189)
Supplement: s1 [file s1]

**Table S1.** Reviews of list of introduced formulas for computing the exchange flow.

| Reference                  | Exchange flow equation                                                                                          | The equivalent of the exchange coefficient                                         | Unit of Coe.      | The value of Coe.                                                                                      | model                                             | Other conditions                                                        |
|----------------------------|-----------------------------------------------------------------------------------------------------------------|------------------------------------------------------------------------------------|-------------------|--------------------------------------------------------------------------------------------------------|---------------------------------------------------|-------------------------------------------------------------------------|
| Bauer et al. [1]           | $Q_{ex} = \sigma A_F K_m \Delta h$                                                                              | $\sigma A_F K_m$                                                                   | $[L^2 T^{-1}]$    | $1.0 \times 10^{-8} \text{ m}^2/\text{s}^{-1}$<br>to<br>$1.0 \times 10^{-4} \text{ m}^2/\text{s}^{-1}$ | The model Carbonate Aquifer Void Evolution (CAVE) |                                                                         |
| Cornaton and Perrochet [2] | $q_{ex} = -\alpha_{ex} [H_m(t) - H_c(t)] \frac{r_c}{2}$<br>$q_{ex} = -K_m \frac{H_m(t) - H_c(t)}{\epsilon r_m}$ | exchange coefficient 3D<br>$\alpha_{ex} = \frac{2 \pi K_m}{\epsilon \sqrt{\beta}}$ | $[L^{-1} T^{-1}]$ |                                                                                                        |                                                   | $\beta = \left(\frac{r_m}{r_c}\right)^2$                                |
|                            |                                                                                                                 | exchange coefficient 1D<br>$\alpha_{ex0} = \pi r_c^2$                              | $[L T^{-1}]$      |                                                                                                        |                                                   |                                                                         |
|                            |                                                                                                                 |                                                                                    |                   |                                                                                                        |                                                   |                                                                         |
| Bauer et al. [3]           | $q_{ex} = \sigma A_F K_F (h_F - h_c)$                                                                           | $\alpha_{ex} = \sigma A_F K_F$                                                     | $[L^2 T^{-1}]$    | $1.0 \times 10^{-7} \text{ m}^2/\text{s}^{-1}$                                                         | The model Carbonate Aquifer Void Evolution (CAVE) |                                                                         |
| Wang [4]                   | $q_{ex,i} = \alpha_{ex,i} (h_{m,i} - h_{c,i})$                                                                  | $\sigma AK$<br>discrete exchange coefficient                                       | $[L^2 T^{-1}]$    |                                                                                                        | A new modification of the original CCPF model     |                                                                         |
|                            |                                                                                                                 | $\sigma$                                                                           | $[L^{-1}]$        |                                                                                                        |                                                   |                                                                         |
|                            |                                                                                                                 | $\tilde{\alpha}_{ex} = \sigma \pi d K$<br>continuum exchange coefficient           | $[L T^{-1}]$      |                                                                                                        |                                                   |                                                                         |
| Reimann et al. [5]         | $q_{ex} = \frac{\dot{K}}{b} P_{ex} \Delta h_{ex}$                                                               | $\frac{\dot{K}}{b}$                                                                | $[1/T]$           | $1.0 \times 10^{-5}$<br>Per second                                                                     | MODBRANCH                                         | $q_{ex}$ equal to exchange flow per unit length of conduit<br>$[L^2/T]$ |
| Kordilla et al. [6]        | $\Gamma_{ex} = \alpha_{ex} K_i K_{ri} (\psi_c - \psi_m)$<br>volumetric fluid exchange rate per unit volume      | $\alpha_{ex} = \frac{\beta}{\sigma^2} \gamma w$                                    | $[L^{-2}]$        | Determined by calibration                                                                              | Hydro GeoSphere model                             | Modified Richard's equation to calculation exchange flow                |
| Saller et al. [7]          | $Q_{ex} = \alpha_{ex} (h_n - h_{ijk})$                                                                          | $\alpha_{ex}$                                                                      | $[L^2 T^{-1}]$    |                                                                                                        | CFP Mode 1 equivalent porous medium (EPM)         |                                                                         |

**Table S1.** Continue of Table S1.

| Reference             | Exchange flow equation                                                 | The equivalent of the exchange coefficient                                                                                             | Unit of Coe.  | The value of Coe.                              | model                                     | Other conditions           |
|-----------------------|------------------------------------------------------------------------|----------------------------------------------------------------------------------------------------------------------------------------|---------------|------------------------------------------------|-------------------------------------------|----------------------------|
| Xu et al. [8]         | $Q_{ex} = ck_{a\beta\gamma} (h_i - h_{a\beta\gamma})$<br>Used for flow | $ck_{a\beta\gamma}$                                                                                                                    | $[L^2T^{-1}]$ |                                                | Conduit Flow Process (CFP <sub>v2</sub> ) |                            |
|                       | $K_{ex} = \frac{\Gamma_i C_{m,i}}{V_{m,i}}$<br>Used for solute         |                                                                                                                                        |               |                                                | UMT3D                                     |                            |
| Hubinger et al. [9]   |                                                                        |                                                                                                                                        | $[L^2T^{-1}]$ | $1.0 \times 10^{-6} \text{ m}^2/\text{s}^{-1}$ | CAVE                                      |                            |
| Giese et al. [10]     | $Q_{exi} = \alpha_{ex} (h_c - h_m)$                                    | $\alpha_{ex}$                                                                                                                          | $[L^2T^{-1}]$ | $0.031 \text{ m}^2/\text{s}^{-1}$              |                                           | Linear and steady exchange |
| Basha and Zoghbi [11] | $q_* = -k_{s*} d_* \frac{dh_{a*}}{dy_*}$                               | The interface height, nodal spacing, and hydraulic conductivity are lumped together in a parameter defined as the exchange coefficient |               |                                                | Analytical Method of Laplace transform    |                            |

**Table S2.** The characteristics of the spring hydrograph in the scenario A1.

| Exchange coefficient<br>( $m^2/s$ ) |                                                                                                | $10^{-2}$            | $10^{-3}$            | $10^{-4}$            | $10^{-5}$             |
|-------------------------------------|------------------------------------------------------------------------------------------------|----------------------|----------------------|----------------------|-----------------------|
| CFR                                 | $T_p$<br>( $min$ )                                                                             | 110                  | 125                  | 110                  | 90                    |
|                                     | $Q_p$<br>( $m^3/min$ )                                                                         | 1.12                 | 0.55                 | 0.10                 | 0.044                 |
|                                     | $V_b$<br>( $m^3$ )                                                                             | 2299.20              | 2312.50              | 1810.50              | 436.08                |
|                                     | Duration of occurrence of $Q_{MC-}$<br>discharge<br>(Point recharge $> Q_{MC-}$ )<br>( $min$ ) |                      |                      |                      |                       |
| CFR                                 | Duration of occurrence of $Q_{MC+}$<br>discharge<br>(Point recharge $> Q_{MC+}$ )<br>( $min$ ) |                      |                      |                      | 90-130                |
|                                     | $\beta$<br>( $m^3/min^2$ )                                                                     |                      |                      |                      | $0.07 \times 10^{-2}$ |
| CFR and /or MRFR                    | Duration of occurrence of $Q_{MC+}$<br>discharge<br>(Point recharge $< Q_{MC+}$ )<br>( $min$ ) | 110-50000            | 125-50000            | 110-50000            | 130-50000             |
|                                     | $\alpha$<br>( $1/min$ )                                                                        | $6.9 \times 10^{-3}$ | $3.2 \times 10^{-3}$ | $1.7 \times 10^{-3}$ | $7.1 \times 10^{-3}$  |
|                                     |                                                                                                | $1.3 \times 10^{-3}$ | $9.7 \times 10^{-4}$ | $2.1 \times 10^{-4}$ | $3.6 \times 10^{-6}$  |
|                                     |                                                                                                | $3.0 \times 10^{-4}$ | $2.9 \times 10^{-4}$ | $9.0 \times 10^{-5}$ |                       |
|                                     |                                                                                                | $5.6 \times 10^{-5}$ | $5.1 \times 10^{-5}$ | $2.4 \times 10^{-5}$ |                       |

**Table S3.** The characteristics of the spring hydrograph in scenario B1.

| Exchange coefficient<br>( $m^2/s$ ) |                                                                                                | $10^{-2}$            | $10^{-3}$            | $10^{-4}$            | $10^{-5}$            |
|-------------------------------------|------------------------------------------------------------------------------------------------|----------------------|----------------------|----------------------|----------------------|
| CFR                                 | $T_p$<br>( $min$ )                                                                             | 100                  | 95                   | 95                   | 95                   |
|                                     | $Q_p$<br>( $m^3/min$ )                                                                         | 15.14                | 16.90                | 19.04                | 19.49                |
|                                     | $V_b$<br>( $m^3$ )                                                                             | 2431.00              | 2411.50              | 1829.50              | 450.34               |
|                                     | Duration of occurrence of $Q_{MC-}$<br>discharge<br>(Point recharge > $Q_{MC-}$ )<br>( $min$ ) | 100-115              | 95-120               | 95-125               | 95-125               |
|                                     | Duration of occurrence of $Q_{MC+}$<br>discharge<br>(Point recharge > $Q_{MC+}$ )<br>( $min$ ) | 115-140              | 120-150              | 125-165              | 125-190              |
|                                     | $\beta$<br>( $m^3/min^2$ )                                                                     | 0.23                 | 0.29                 | 0.31                 | 0.32                 |
| CFR and /or MRFR                    | Duration of occurrence of $Q_{MC+}$<br>discharge<br>(Point recharge < $Q_{MC+}$ )<br>( $min$ ) | 140-50000            | 150-50000            | 165-50000            | 190-50000            |
|                                     | $\alpha$<br>( $1/min$ )                                                                        | $2.4 \times 10^{-2}$ | $3.6 \times 10^{-2}$ | $4.0 \times 10^{-2}$ | $2.3 \times 10^{-2}$ |
|                                     |                                                                                                | $3.9 \times 10^{-3}$ | $3.1 \times 10^{-3}$ | $6.0 \times 10^{-4}$ | $3.6 \times 10^{-6}$ |
|                                     |                                                                                                | $1.1 \times 10^{-3}$ | $8.7 \times 10^{-4}$ | $1.1 \times 10^{-4}$ |                      |
|                                     |                                                                                                | $3.3 \times 10^{-4}$ | $3.0 \times 10^{-4}$ | $2.4 \times 10^{-5}$ |                      |
|                                     |                                                                                                | $5.6 \times 10^{-5}$ | $5.1 \times 10^{-5}$ |                      |                      |

**Table S4.** The characteristics of spring hydrograph in response to changes of conduit diameter in scenario A2.

| <b>Diameter<br/>(m)</b> |                                                                                            | <b>0.5</b>                                                                                   | <b>0.4</b>                                                                                   | <b>0.3</b>                                                                                   | <b>0.2</b>                                                                                   | <b>0.1</b>                                                                                   |
|-------------------------|--------------------------------------------------------------------------------------------|----------------------------------------------------------------------------------------------|----------------------------------------------------------------------------------------------|----------------------------------------------------------------------------------------------|----------------------------------------------------------------------------------------------|----------------------------------------------------------------------------------------------|
| <b>CFR</b>              | $T_p$<br>(min)                                                                             | 125                                                                                          | 125                                                                                          | 125                                                                                          | 125                                                                                          | 125                                                                                          |
|                         | $Q_p$<br>( $m^3/min$ )                                                                     | 0.55                                                                                         | 0.54                                                                                         | 0.49                                                                                         | 0.32                                                                                         | 0.098                                                                                        |
|                         | $V_b$<br>( $m^3$ )                                                                         | 2312.65                                                                                      | 2313.60                                                                                      | 2317.50                                                                                      | 2325.97                                                                                      | 1952.35                                                                                      |
|                         | Duration of occurrence of $Q_{MC-}$<br>discharge<br>(Point recharge > $Q_{MC-}$ )<br>(min) |                                                                                              |                                                                                              |                                                                                              |                                                                                              |                                                                                              |
| <b>CFR and /or MRFR</b> | Duration of occurrence of $Q_{MC+}$<br>discharge<br>(Point recharge > $Q_{MC+}$ )<br>(min) |                                                                                              |                                                                                              |                                                                                              |                                                                                              |                                                                                              |
|                         | $\beta$<br>( $m^3/min^2$ )                                                                 |                                                                                              |                                                                                              |                                                                                              |                                                                                              |                                                                                              |
|                         | Duration of occurrence of $Q_{MC+}$<br>discharge<br>(Point recharge < $Q_{MC+}$ )<br>(min) | 125- 50000                                                                                   | 125- 50000                                                                                   | 125-50000                                                                                    | 125- 50000                                                                                   | 125- 50000                                                                                   |
|                         | $\alpha$<br>(1/ min)                                                                       | $3.2 \times 10^{-3}$<br>$9.7 \times 10^{-4}$<br>$2.9 \times 10^{-4}$<br>$5.1 \times 10^{-5}$ | $3.1 \times 10^{-3}$<br>$9.5 \times 10^{-4}$<br>$2.9 \times 10^{-4}$<br>$5.0 \times 10^{-5}$ | $2.6 \times 10^{-3}$<br>$8.8 \times 10^{-4}$<br>$2.8 \times 10^{-4}$<br>$5.0 \times 10^{-5}$ | $1.5 \times 10^{-3}$<br>$5.6 \times 10^{-4}$<br>$2.3 \times 10^{-4}$<br>$4.9 \times 10^{-5}$ | $1.5 \times 10^{-3}$<br>$2.7 \times 10^{-4}$<br>$8.7 \times 10^{-5}$<br>$2.3 \times 10^{-5}$ |

**Table S5.** The characteristics of spring hydrograph in response to changes in conduit diameter in scenario B2.

| <b>Diameter<br/>(m)</b> |                                                                                         | <b>0.5</b>           | <b>0.4</b>           | <b>0.3</b>           | <b>0.2</b>           | <b>0.1</b>           |
|-------------------------|-----------------------------------------------------------------------------------------|----------------------|----------------------|----------------------|----------------------|----------------------|
|                         | $T_p$<br>(min)                                                                          | 95                   | 95                   | 95                   | 100                  | 105                  |
|                         | $Q_p$<br>( $m^3/min$ )                                                                  | 16.90                | 13.94                | 10.11                | 5.17                 | 0.62                 |
|                         | $V_b$<br>( $m^3$ )                                                                      | 2411.30              | 2534.85              | 2753.15              | 2813.99              | 2813.99              |
| <b>CFR</b>              | Duration of occurrence of $Q_{MC-}$ discharge<br>(Point recharge > $Q_{MC-}$ )<br>(min) | 95-120               | 95-125               | 95-135               | 100-145              | 105-160              |
|                         | Duration of occurrence of $Q_{MC+}$ discharge<br>(Point recharge > $Q_{MC+}$ )<br>(min) | 125-150              | 125-150              | 135- 155             | 145-150              |                      |
|                         | $\beta$<br>( $m^3/min^2$ )                                                              | 0.29                 | 0.22                 | 0.15                 | 0.07                 | 0.003                |
| <b>CFR and /or MRFR</b> | Duration of occurrence of $Q_{MC+}$ discharge<br>(Point recharge < $Q_{MC}$ )<br>(min)  | 155- 50000           | 155- 50000           | 155-50000            | 155- 50000           | 160-50000            |
|                         | $\alpha$<br>(1/ min)                                                                    | $3.6 \times 10^{-2}$ | $2.9 \times 10^{-2}$ | $2.1 \times 10^{-2}$ | $1.5 \times 10^{-2}$ | $3.6 \times 10^{-3}$ |
|                         |                                                                                         | $3.1 \times 10^{-3}$ | $3.8 \times 10^{-3}$ | $3.7 \times 10^{-3}$ | $2.9 \times 10^{-3}$ | $1.5 \times 10^{-3}$ |
|                         |                                                                                         | $8.7 \times 10^{-4}$ | $1.0 \times 10^{-3}$ | $1.1 \times 10^{-3}$ | $9.2 \times 10^{-4}$ | $7.0 \times 10^{-4}$ |
|                         |                                                                                         | $3.0 \times 10^{-4}$ | $3.3 \times 10^{-4}$ | $3.9 \times 10^{-4}$ | $3.6 \times 10^{-4}$ | $2.8 \times 10^{-4}$ |
|                         |                                                                                         | $5.1 \times 10^{-5}$ | $5.1 \times 10^{-5}$ | $5.1 \times 10^{-5}$ | $2.1 \times 10^{-5}$ | $2.1 \times 10^{-5}$ |

**Table S6.** The spring hydrograph changes influenced by matrix hydraulic conductivity changes in scenario A3.

| Hydraulic conductivity<br>( <i>m/s</i> ) |                                                                                                     | $10^{-3}$            | $10^{-4}$                                    | $10^{-5}$                                                                                    | $10^{-6}$                                                                                    |
|------------------------------------------|-----------------------------------------------------------------------------------------------------|----------------------|----------------------------------------------|----------------------------------------------------------------------------------------------|----------------------------------------------------------------------------------------------|
| CFR                                      | $T_p$<br>( <i>min</i> )                                                                             | 150                  | 135                                          | 125                                                                                          | 110                                                                                          |
|                                          | $Q_p$<br>( $m^3/min$ )                                                                              | 0.87                 | 0.76                                         | 0.55                                                                                         | 0.33                                                                                         |
|                                          | $V_b$<br>( $m^3$ )                                                                                  | 2424.35              | 2438.15                                      | 2312.50                                                                                      | 940.250                                                                                      |
|                                          | Duration of occurrence of $Q_{MC-}$<br>discharge<br>(Point recharge > $Q_{MC-}$ )<br>( <i>min</i> ) |                      |                                              |                                                                                              |                                                                                              |
|                                          | Duration of occurrence of $Q_{MC+}$<br>discharge<br>(Point recharge > $Q_{MC+}$ )<br>( <i>min</i> ) |                      |                                              |                                                                                              |                                                                                              |
| $\beta$<br>( $m^3/min^2$ )               |                                                                                                     |                      |                                              |                                                                                              |                                                                                              |
| CFR and/or MRFR                          | Duration of occurrence of $Q_{MC+}$<br>discharge<br>(Point recharge < $Q_{MC+}$ )<br>( <i>min</i> ) | 150-50000            | 135-50000                                    | 125- 50000                                                                                   | 110- 50000                                                                                   |
|                                          | $\alpha$<br>( $1/min$ )                                                                             | $3.5 \times 10^{-4}$ | $6.5 \times 10^{-4}$<br>$2.6 \times 10^{-4}$ | $3.2 \times 10^{-3}$<br>$9.7 \times 10^{-4}$<br>$2.9 \times 10^{-4}$<br>$1.3 \times 10^{-5}$ | $7.7 \times 10^{-3}$<br>$1.3 \times 10^{-3}$<br>$2.8 \times 10^{-4}$<br>$1.3 \times 10^{-5}$ |

**Table S7.** The spring hydrograph changes influenced by matrix hydraulic conductivity changes in scenario B3.

| Hydraulic conductivity<br>( $m/s$ ) |                                                                                                | $10^{-3}$            | $10^{-4}$            | $10^{-5}$            | $10^{-6}$            |
|-------------------------------------|------------------------------------------------------------------------------------------------|----------------------|----------------------|----------------------|----------------------|
| CFR                                 | $T_p$<br>( $min$ )                                                                             | 95                   | 95                   | 95                   | 95                   |
|                                     | $Q_p$<br>( $m^3/min$ )                                                                         | 16.27                | 16.44                | 16.90                | 17.54                |
|                                     | $V_b$<br>( $m^3$ )                                                                             | 2600.20              | 2585.00              | 2411.34              | 980.55               |
|                                     | Duration of occurrence of $Q_{MC-}$<br>discharge<br>(Point recharge $> Q_{MC-}$ )<br>( $min$ ) | 95-125               | 95-125               | 95-120               | 95-110               |
|                                     | Duration of occurrence of $Q_{MC+}$<br>discharge<br>(Point recharge $> Q_{MC+}$ )<br>( $min$ ) | 130- 155             | 130- 155             | 125- 150             | 110- 155             |
|                                     | $\beta$<br>( $m^3/min^2$ )                                                                     | 0.27                 | 0.28                 | 0.29                 | 0.29                 |
| CIFR and /or MRFR                   | Duration of occurrence of $Q_{MC+}$<br>discharge<br>(Point recharge $< Q_{MC+}$ )<br>( $min$ ) | 155-50000            | 160-50000            | 155-50000            | 160-50000            |
|                                     | $\alpha$<br>( $1/min$ )                                                                        | $2.6 \times 10^{-2}$ | $2.7 \times 10^{-2}$ | $3.6 \times 10^{-2}$ | $5.3 \times 10^{-2}$ |
|                                     |                                                                                                | $4.8 \times 10^{-4}$ | $1.3 \times 10^{-3}$ | $3.1 \times 10^{-3}$ | $3.9 \times 10^{-3}$ |
|                                     |                                                                                                | $3.5 \times 10^{-4}$ | $4.7 \times 10^{-4}$ | $8.7 \times 10^{-4}$ | $1.2 \times 10^{-3}$ |
|                                     |                                                                                                |                      | $2.5 \times 10^{-4}$ | $3.0 \times 10^{-4}$ | $2.8 \times 10^{-4}$ |
|                                     |                                                                                                |                      |                      | $5.0 \times 10^{-5}$ | $1.2 \times 10^{-5}$ |



## Appendix A: Nomenclature

$A_F, A$  [ $L^2$ ]: The exchange surface between the conduit and the fissured matrix

$Ck_{\alpha\beta\gamma}$  [ $L^2T^{-1}$ ]: Pipe conductance in MODFLOW cell  $\alpha\beta\gamma$

$C_{m,i}$  [ $ML^{-3}$ ]: Concentration in the porous matrix at conduit node  $i$

$d$  [ $L$ ]: The height of the conduit interface

$h_C$  [ $L$ ]: The head in the conduit

$h_F$  [ $L$ ]: The head in the fissured system

$h_i, h_n$  [ $L$ ]: The head in the conduit node  $i$  or  $n$

$h_{\alpha\beta\gamma}, h_{ijk}, h_m$  [ $L$ ]: The head in the matrix cell

$h_a$  [ $L$ ]: the height of the water table measured from the same base level as for the conduit

$K_F, K, K_m$  [ $L T^{-1}$ ]: The hydraulic conductivity of the matrix or fissured system

$K_i$  [ $L T^{-1}$ ]: the hydraulic conductivity of the interface between matrix and conduit  
(e.g. sediments)

$k_{ri}$  [-]: the relative permeability of the interface between matrix and conduit

$k_s$  [ $L T^{-1}$ ]: The saturated hydraulic conductivity

$K_{ex}$  [ $ML^{-3}T^{-1}$ ]: Advective exchange rate between a conduit and matrix

$P_{ex}$  [L]: exchange perimeter

$q_{ex}$  [L<sup>2</sup>/T]: lateral outflow per unit length of the channel (Reimann *et al.*, 2011)

$Q_{ex}, \Gamma_i$  [L<sup>3</sup>T<sup>-1</sup>]: the volumetric exchange rate between the conduit and the matrix

$r_c$  [L]: The conduit radii

$r_m$  [L]: The matrix radii

$V_{m,i}$  [L<sup>3</sup>]: The volume of the respective cell

$y$  [L]: The horizontal lateral coordinate

$\sigma$  [L<sup>-1</sup>]: Parameter that depends on conduit geometry and is as inverse fissure spacing

$\sigma$  [L<sup>-1</sup>]: The distance between the centre of a matrix block and the adjacent fracture or conduit (Kordilla *et al.*, 2012)

$\beta$ : A geometry factor (3 for rectangular matrix blocks, 15 for spheres)

$\gamma_w$ : An empirical coefficient usually set to 0.4

$\psi_c, \psi_m$ : the pressure heads in the conduit and matrix, respectively

$\varepsilon$ : A factor multiplying  $r_m$  ( the distance allowing to evaluate the gradient being unknown a priori)

## Reference

1. Bauer, S.; Liedl, R.; Sauter, M. Modelling of karst development considering conduit-matrix exchange flow. Calibration and Reliability in Groundwater Modelling. In Proceedings of the ModelCARE 99 Conference held at Zurich, Switzerland, September 1999, IAHS 265, 2000; pp. 10–15.
2. Cornaton, F.; Perrochet, P. Analytical 1D dual-porosity equivalent solutions to 3D discrete single-continuum models. Application to karstic spring hydrograph modelling. *J. Hydrol.* **2002**, *262*, 165–176, doi:10.1016/s0022-1694(02)00033-1.
3. Bauer, S.; Liedl, R.; Sauter, M. Modeling of karst aquifer genesis: Influence of exchange flow. *Water Resour. Res.* **2003**, *39*, 1–12, doi:10.1029/2003wr002218.
4. Wang, X. On the coupled continuum pipe flow model (CCPF) for flows in karst aquifer. *Discret. Contin. Dyn. Syst. - B* **2010**, *13*, 489–501, doi:10.3934/dcdsb.2010.13.489.
5. Reimann, T.; Geyer, T.; Shoemaker, W.B.; Liedl, R.; Sauter, M. Effects of dynamically variable saturation and matrix-conduit coupling of flow in karst aquifers. *Water Resour. Res.* **2011**, *47*, 1–19, doi:10.1029/2011wr010446.
6. Kordilla, J.; Sauter, M.; Reimann, T.; Geyer, T. Simulation of saturated and unsaturated flow in karst systems at catchment scale using a double continuum approach. *Hydrol. Earth Syst. Sci.* **2012**, *16*, 3909–3923, doi:10.5194/hess-16-3909-2012.
7. Saller, S.P.; Ronayne, M.J.; Long, A.J. Comparison of a karst groundwater model with and without discrete conduit flow. *Hydrogeol. J.* **2013**, *21*, 1555–1566, doi:10.1007/s10040-013-1036-6.
8. Xu, Z.; Hu, B.X.; Davis, H.; Cao, J. Simulating long term nitrate-N contamination processes in the Woodville Karst Plain using CFPv2 with UMT3D. *J. Hydrol.* **2015**, *524*, 72–88, doi:10.1016/j.jhydrol.2015.02.024.
9. Hubinger, B.; Birk, S.; Hergarten, S. A New Equation Solver for Modeling Turbulent Flow in Coupled Matrix-Conduit Flow Models. *Ground Water* **2016**, *54*, 596–602, doi:10.1111/gwat.12400.
10. Giese, M. Identification and quantification of the effects of flow regime and matrix-conduit interaction in the characterization of karst aquifers. Ph.D. Thesis, Georg-August-University Göttingen, Germany, **2017**.
11. Basha, H.A.; Zoghbi, C.A. Simplified Physically Based Models for Pressurized Flow in Karst Systems. *Water Resour. Res.* **2018**, *54*, 7198–7215, doi:10.1029/2018wr023331.
